# Supplementary material
Source: PubMed Central journal article supplement (PMC9256726)
Supplement: 12276_2022_791_MOESM1_ESM.pdf [file 12276_2022_791_MOESM1_ESM.pdf]

# Supplementary Fig.1

**a**

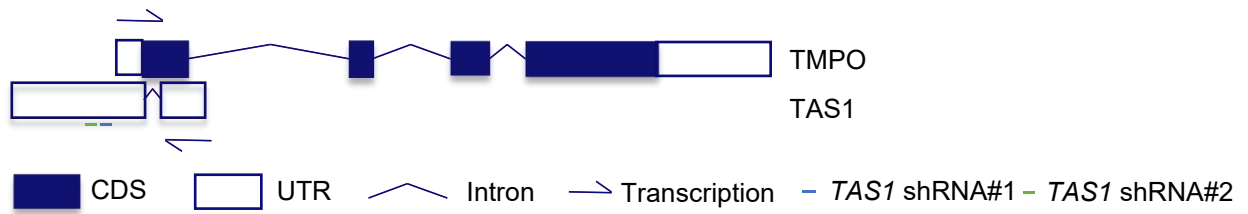

**b**

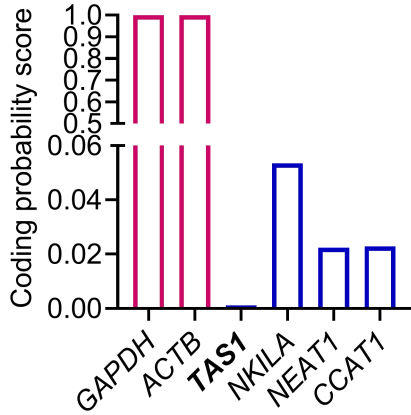

**c**

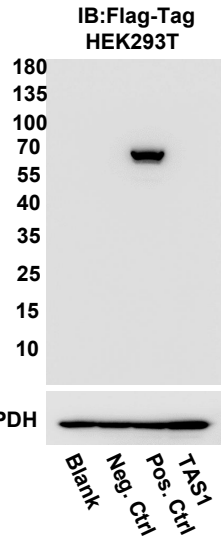

**d**

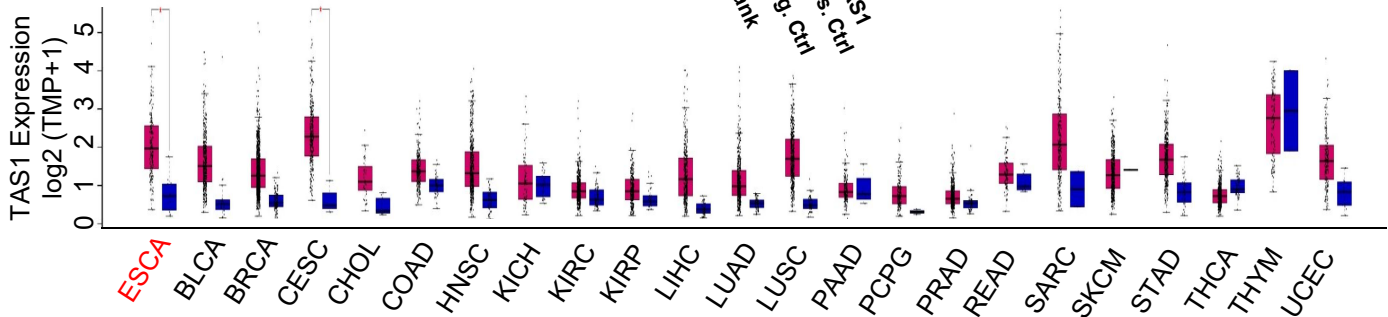

**e**

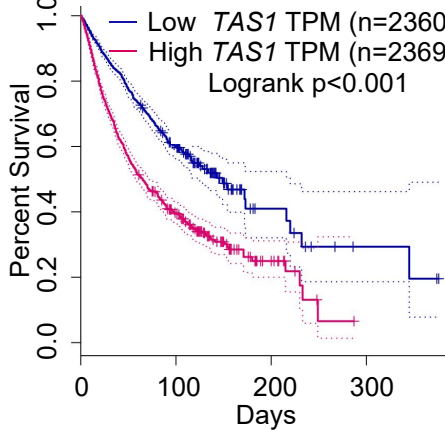

**f**

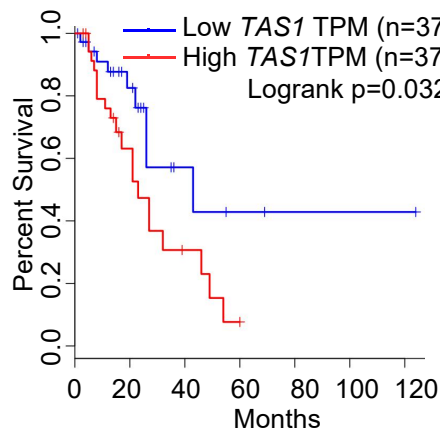

**g**

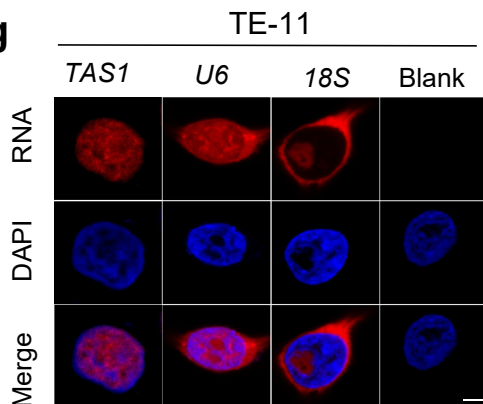

**h**

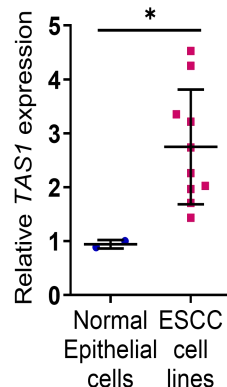

# Supplementary Fig.2

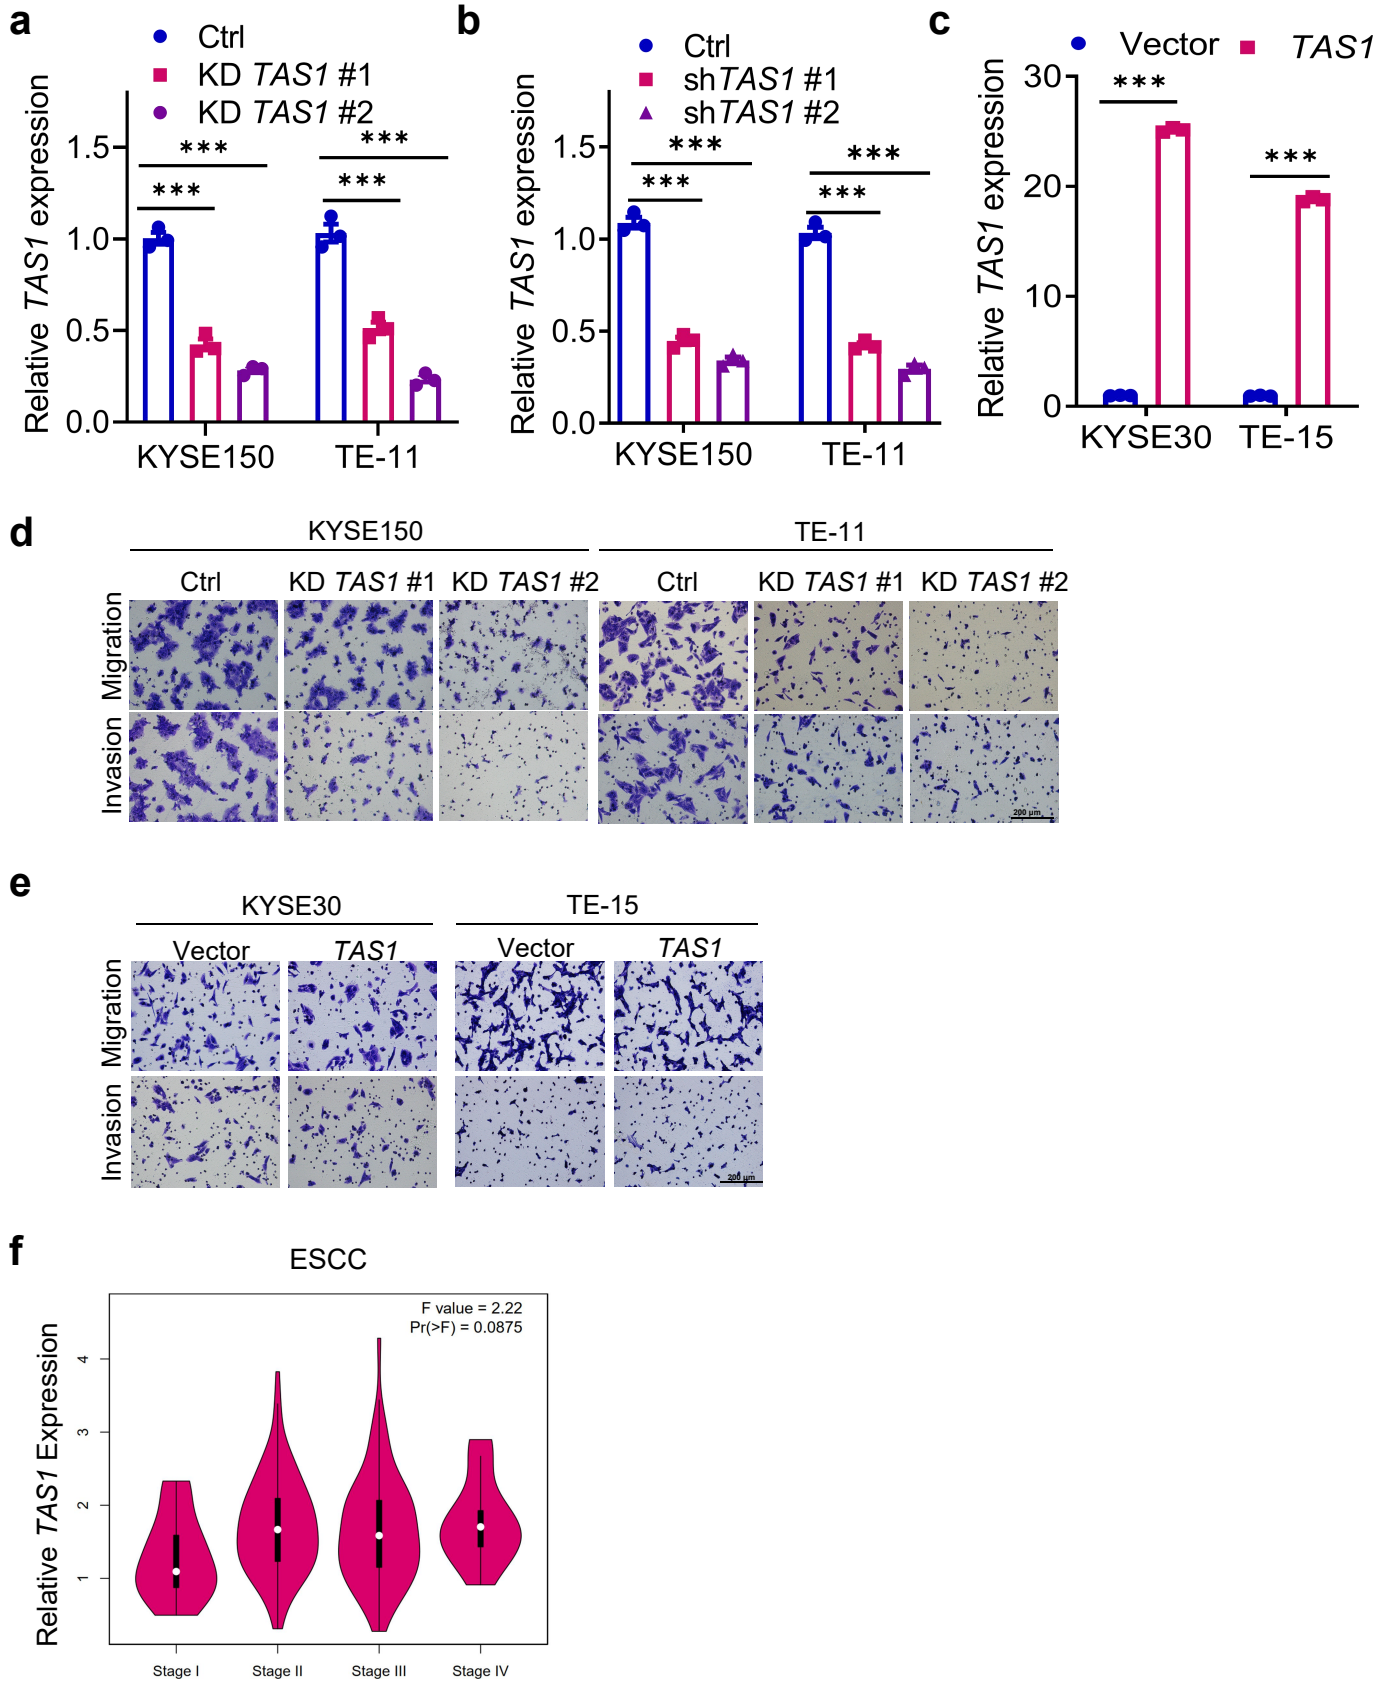

# Supplementary Fig.3

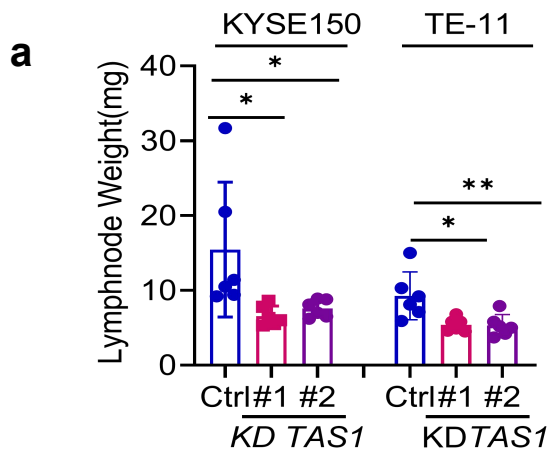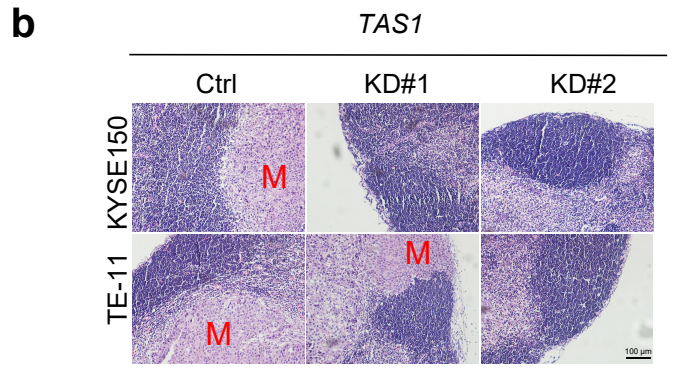

# Supplementary Fig.4

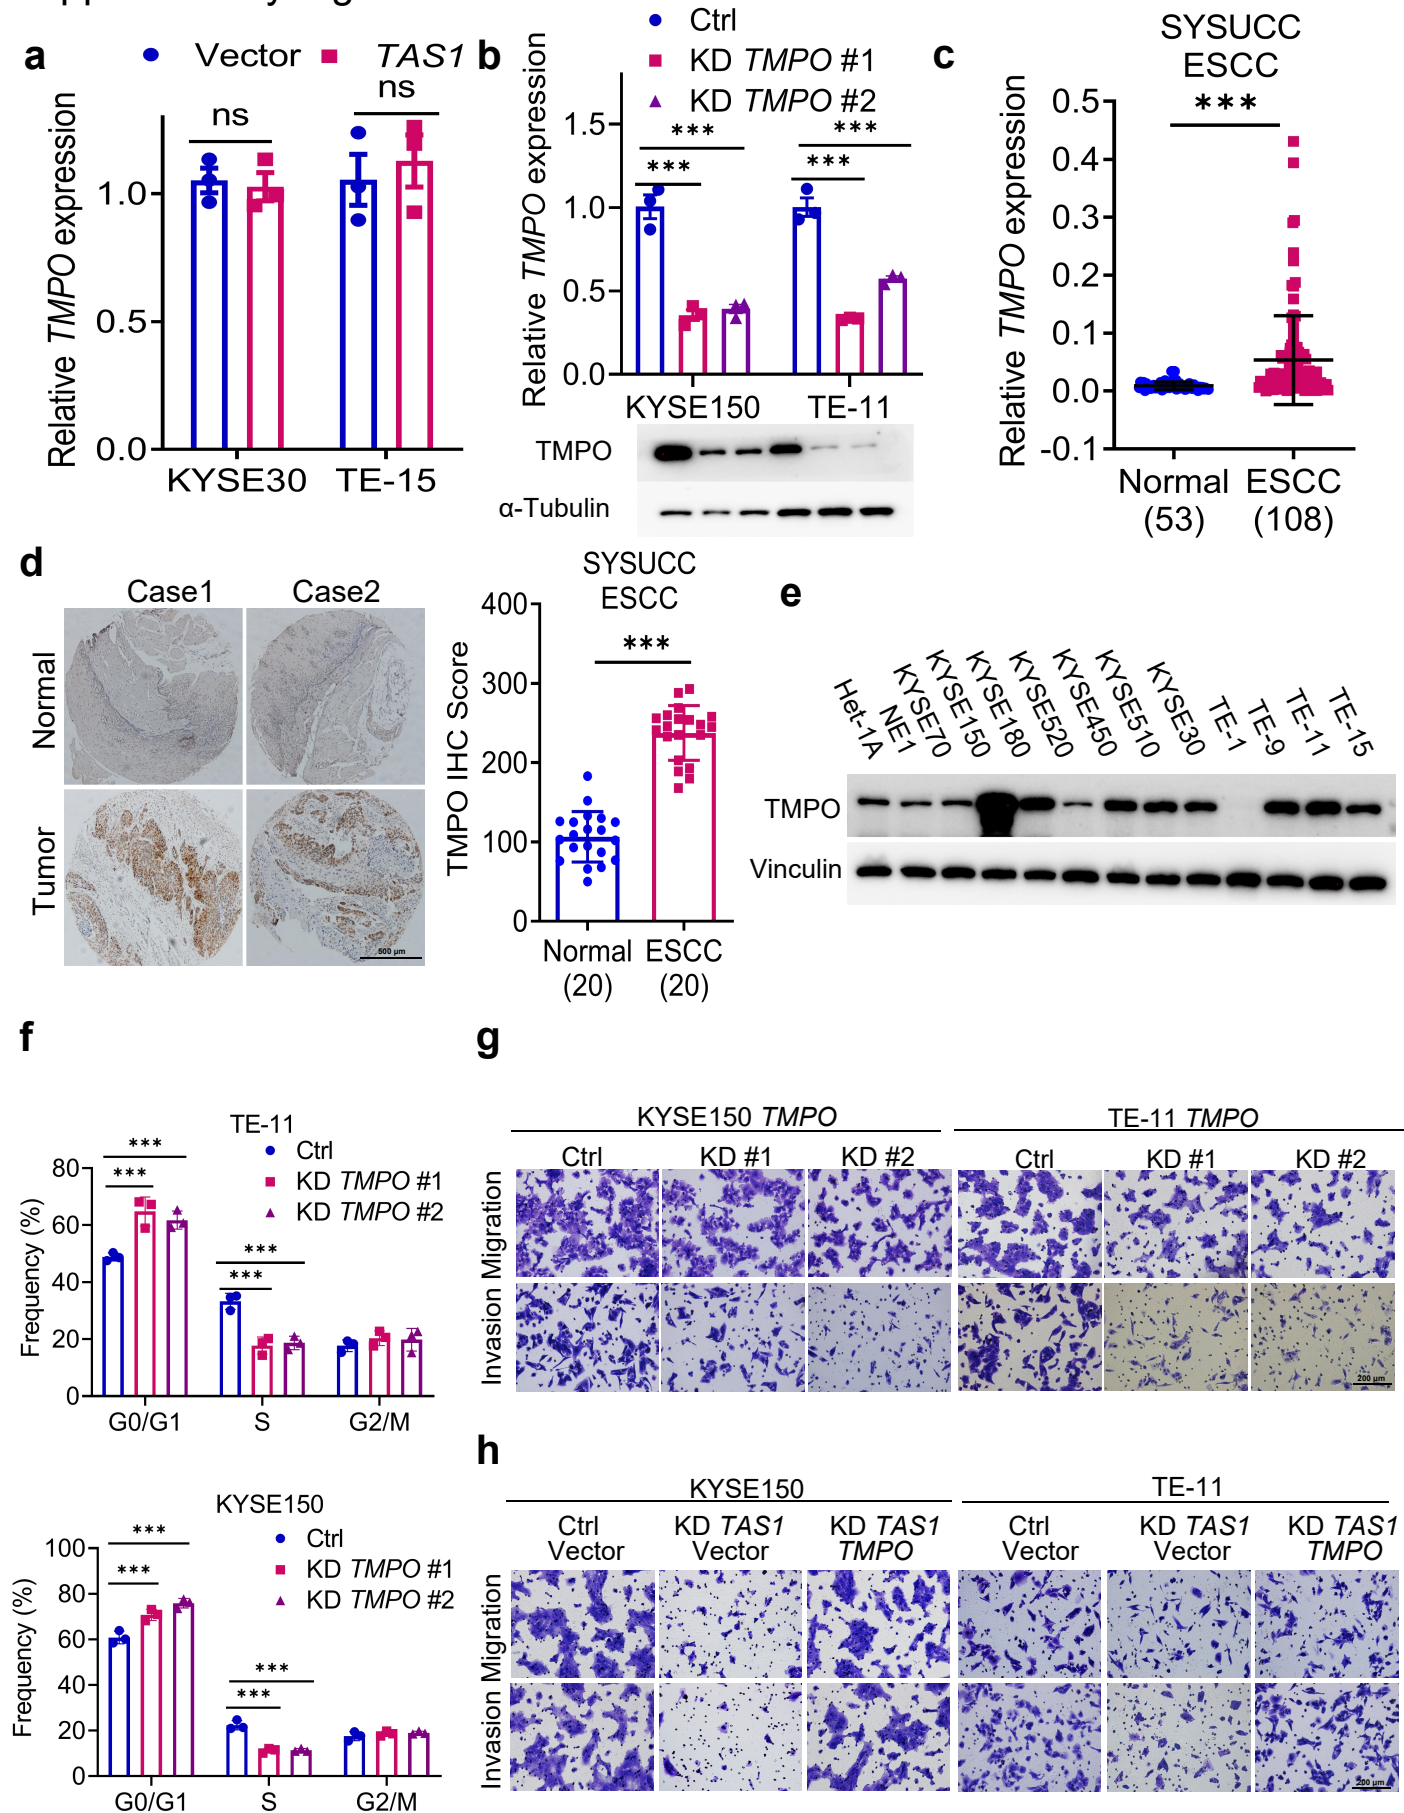

# Supplementary Fig.5

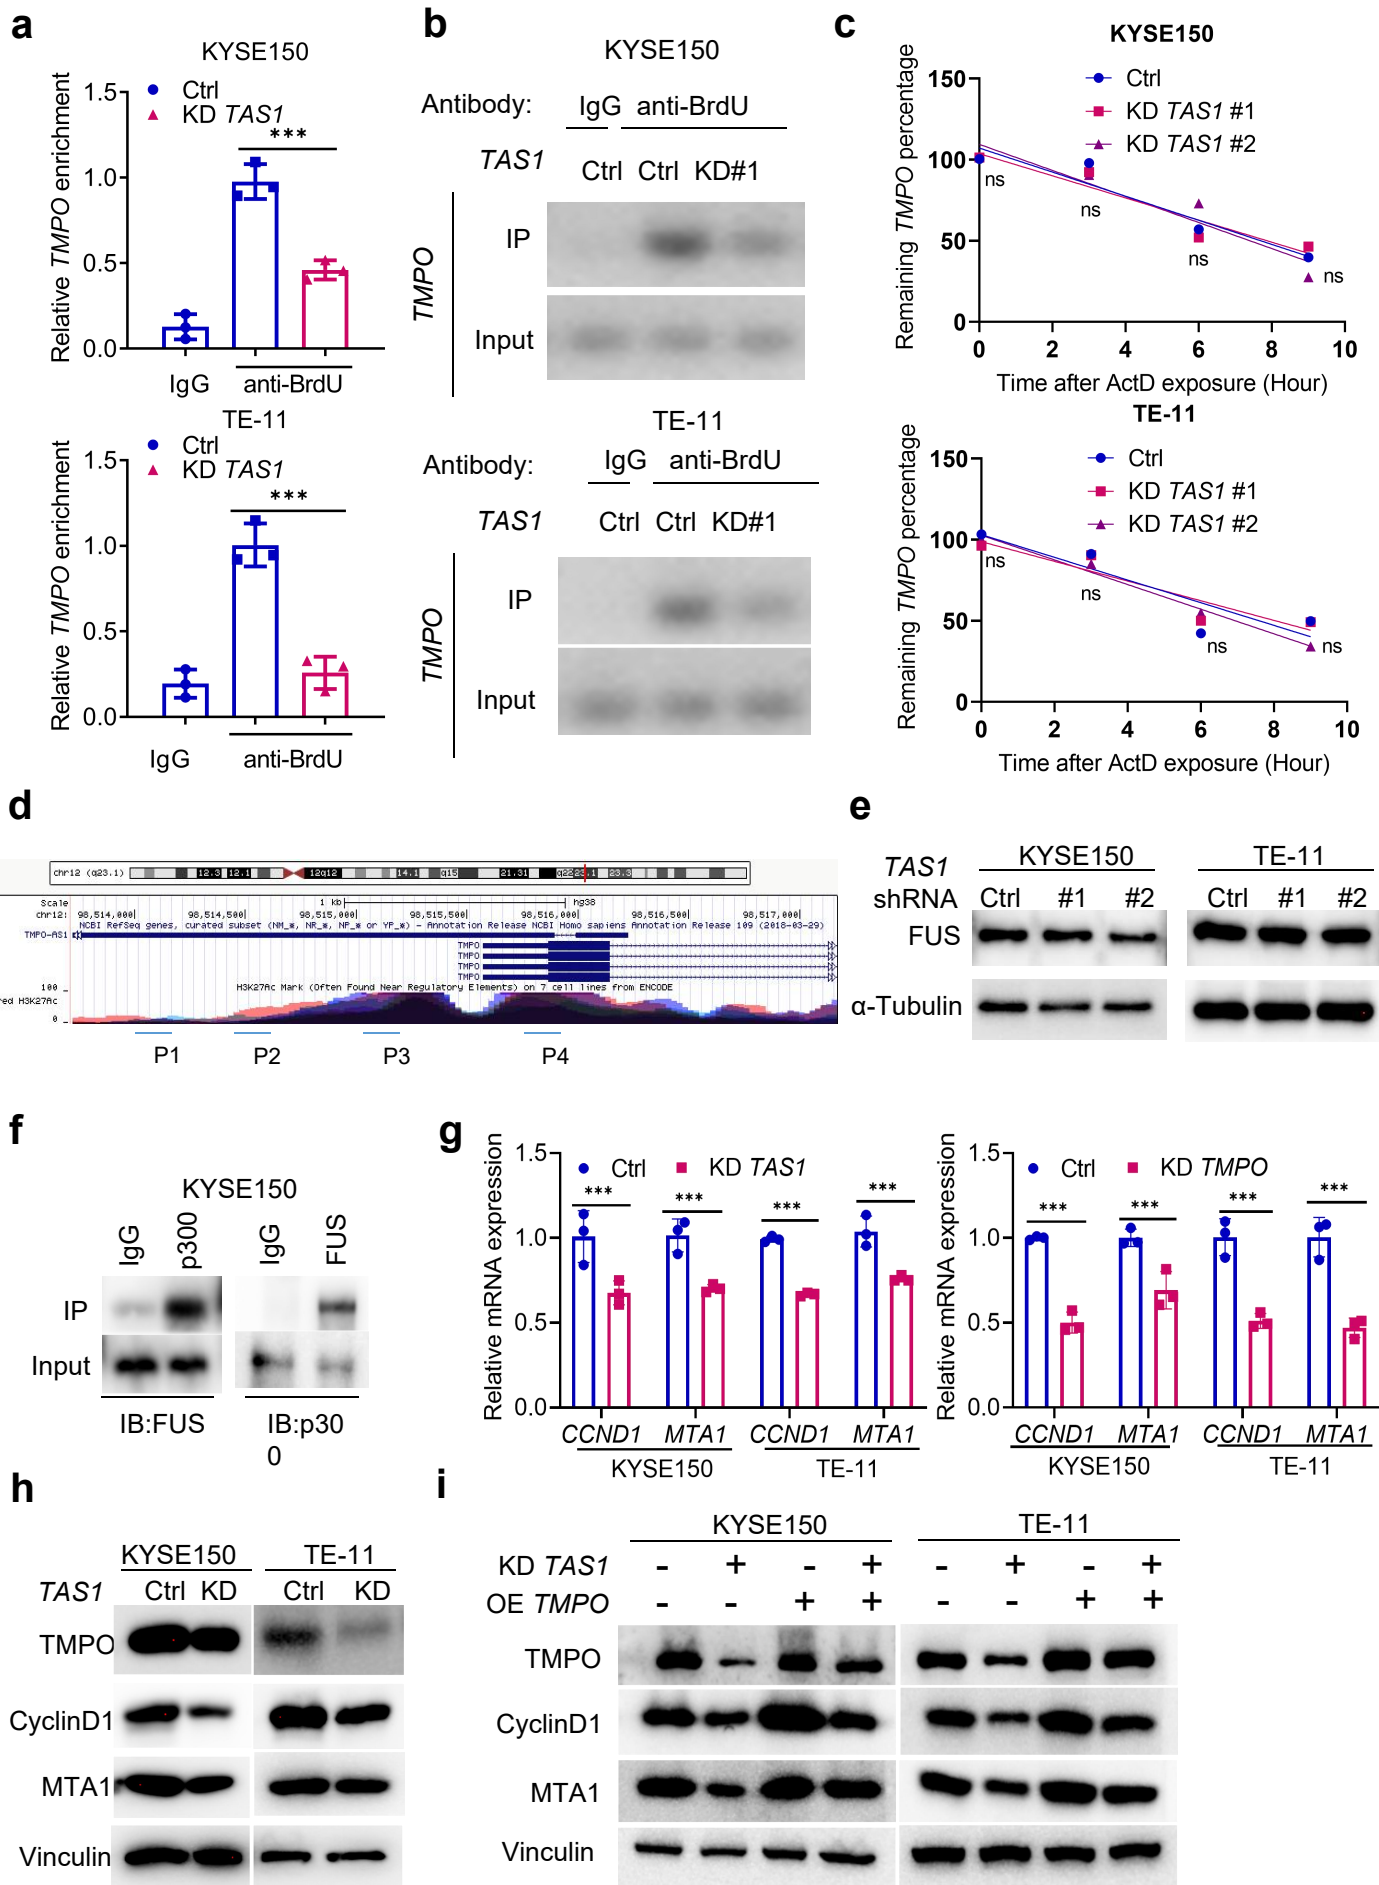

## Supplementary Figure legends

**Supplementary Fig.1.** The lncRNA *TASI* is upregulated in ESCC and indicates a poor prognosis.

- a. Schematic displaying the genomic location of *TASI* and its cognate gene *TMPO* and the positions of the *TASI* shRNAs targeting sequences.
- b. The coding probabilities of *TASI* and other lncRNAs assessed using the CPAT; *GAPDH* and *ACTB* served as coding gene references.
- c. Immunoblotting results of potential protein or peptide coded by *TASI*. *TASI* sequence was cloned upstream of 3xFlag-Tag cassette, transfected in 293 T cells, and immunoblotted for Flag antibody. Positive control was a well characterized coding protein PTBP1 with 3xFlag-Tag.
- d. *TASI* expression in multiple human cancer samples from TCGA data.
- e. Kaplan-Meier analysis of the OS curves for a set of patients with multiple cancers presenting with low (n = 2360) or high (n = 2369) *TASI* expression (log-rank test) from TCGA data.
- f. Kaplan-Meier analysis of the OS curves for patients with ESCA presenting low (n = 37) or high (n = 37) *TASI* expression (log-rank test) from TCGA data.
- g. FISH detection of the *TASI* subcellular localization in TE-11 cells. Scale bar: 5  $\mu$ m.
- h. qPCR detection of *TASI* expression in 10 ESCC cell lines and 2 normal esophageal epithelial cells.

Data are presented as the means $\pm$ S.D., \*P < 0.05, \*\*P < 0.01, \*\*\*P < 0.001, and ns, not significant.

**Supplementary Fig.2.** *TASI* promotes cell proliferation, migration and invasion in vitro.

- a, b. qPCR detection of *TASI* knockdown efficiency in KYSE150 and TE-11 cells using ASOs and lentivirus shRNA (n=3).
- c. qPCR detection of *TASI* overexpression efficiency in KYSE30 and TE-15 cells (n=3).

d, e. Transwell assays were used to determine the invasion and migration abilities of KYSE150 and TE-11 cells with *TASI* KD or KYSE30 and TE-15 cells with *TASI* OE. Scale bar, 200  $\mu$ m.

f. Statistical analysis of *TASI* expression in patients with ESCC of each American Joint Committee on Cancer (AJCC) stage.

Data are presented as the means $\pm$ S.D., \*P < 0.05, \*\*P < 0.01, \*\*\*P < 0.001, and ns, not significant.

**Supplementary Fig.3.** *TASI* functions as an oncogenic lncRNA in ESCC in vivo.

a. Statistical analysis of the popliteal lymph node weight in the indicated groups (n=6).

b. Representative images of H&E staining of the dissected popliteal lymph nodes from the indicated groups. The metastatic micro nodules were marked. Scale bar, 100  $\mu$ m.

Data are presented as the means $\pm$ S.D., \*P < 0.05, \*\*P < 0.01, \*\*\*P < 0.001, and ns, not significant.

**Supplementary Fig.4.** *TMPO* is upregulated in ESCC, and *TASI* exerts its biological functions by cis-activating *TMPO* transcription.

a. qPCR detection of *TMPO* expression in KYSE30 and TE-15 cells with *TASI* OE compared with the control (n=3).

b. qPCR and WB detection of *TMPO* knockdown efficiency in KYSE150 and TE-11 cells transfected with siRNAs (n=3).

c. qPCR detection of *TMPO* expression in ESCC samples (SYSUCC, n=108).

d. *TMPO* expression in ESCC tissues measured by IHC and the statistical analysis of IHC score. (SYSUCC, n=20)

e. WB analysis of *TMPO* expression in a panel of ESCC cell lines(n=10) and two normal esophageal epithelial cells (Het-1A and NE1).

f. Statistical analysis of KYSE150 and TE-11 cells with *TMPO* KD (%) in each cell cycle phase (n=3).

g-h. Transwell assays were used to determine the invasion and migration abilities of KYSE150 and TE-11 cells with indicated treatments. Scale bar, 200  $\mu$ m.

Data are presented as the means $\pm$ S.D, \*P < 0.05, \*\*P < 0.01, \*\*\*P < 0.001, and ns, not significant.

**Supplementary Fig.5.** *TASI* regulates H3K27ac enrichment at the *TMPO* promoter by recruiting FUS and p300.

a, b. Nascent *TMPO* mRNA levels were detected using NRO assays followed by qPCR analysis in KYSE150 and TE-11 cells with the indicated treatments.

c. *TMPO* mRNA stability determined by qPCR in KYSE150 and TE-11 cells with the indicated treatments in the presence of ActD.

d. Display of H3K27ac enrichment at the *TMPO* promoter region from the UCSC genome browser data.

e. Immunoblotting of FUS expression after *TASI* KD in KYSE150 and TE-11 cells.

f. Co-IP analysis confirmed that FUS formed complexes with p300 in KYSE150 cells.

g. A qPCR array was used to screen the downstream target genes of *TASI/TMPO*. *CCND1* and *MTA1* mRNAs were downregulated after *TASI/TMPO* KD in KYSE150 and TE-11 cells.

h. WB analysis showed that *TMPO*, *CyclinD1* and *MTA1* protein levels were reduced after *TASI* KD.

i. Immunoblotting analysis showed the expression of *TASI*-regulated genes in KYSE150 and TE-11 cells with *TASI* knockdown with or without *TMPO* overexpression.

Data are presented as the means $\pm$ S.D, \*P < 0.05, \*\*P < 0.01, \*\*\*P < 0.001, and ns, not significant.



## Supplementary Methods

### RNA isolation and quantitative real-time PCR (qPCR) assays

Total RNA was extracted from cultured cells using an EZ-press RNA Purification Kit (EZBioscience, Shanghai, China) according to instructions. qPCR was performed to determine relative gene expression according to the manufacturer's instructions. The primer sequences used are listed in Supplementary Table 2.

### RNA interference and lentivirus transfection

*TASI* antisense oligonucleotides (ASOs) and TMPO siRNAs were provided by RiboBio. Short hairpin RNAs (shRNAs) were provided by OBiO Technology (Shanghai, China). The constructs were verified by sequencing. The sequences are listed in Supplementary Table 10. The position of the targeting sequences were shown in Supplementary Fig. 1 a. KYSE150 and TE-11 cells were transfected with 25 nM ASOs or 50 nM siRNA using Lipofectamine RNAiMAX transfection reagent (Thermo Fisher Scientific, Waltham, MA, USA). KYSE150 and TE-11 cells were infected with lentivirus containing shRNAs targeting *TASI* in the presence of 5 mg/ml polybrene and selected with 5 µg/ml puromycin (Invivogen, France) to establish stable knockdown cells. Cell transfections and lentiviral infections were performed according to the manufacturer's instructions. Expression efficiency was assessed by qPCR and WB analysis.

### Cytosolic/nuclear fractionation

Relative *TASI* expression in cytoplasmic and nuclear fractions was determined using a Cytoplasmic & Nuclear RNA Purification Kit (Norgen Biotek Corp, Canada) according to the manufacturer's instructions. RNA was extracted from the cytoplasmic and nuclear fractions and subjected to qPCR analysis as described. β-Actin was used as a cytosolic marker, and U6 was used

as a nuclear marker.

### **Fluorescence in situ hybridization (FISH) assay and immunofluorescence (IF) staining**

FISH assays were performed using a lncRNA FISH Kit (RiboBio, Guangzhou, China) according to the manufacturer's instructions. Briefly, ESCC cells were fixed and permeabilized. Next, *TASI* FISH probes designed by RiboBio were added, and hybridization was carried out overnight in a dark humidified chamber at 37 °C. All images were obtained with a Zeiss LSM880 high-resolution laser confocal microscope (Germany). Cy3 and DAPI channels were used for detection. 18S and U6 were used as markers for the cytosol and nucleus, respectively. IF was performed according to manufacturer's instructions, and anti-FUS antibody (5 µg/ml, Abcam, ab70381) was used.

### **MS2-tagged RNA affinity purification**

ESCC KYSE150 and TE-11 cells were cotransfected with pcDNA3.1-MS2 or pcDNA3.1-MS2-*TASI* and MCP-3FLAG plasmids (OBiO Technology, Shanghai, China).

Forty-eight hours after transfection, living cells were irradiated with 254 nm UV light at 400 mJ per cm<sup>2</sup> for crosslinking. Then, the cell lysates were collected. FLAG-tagged MCP-MS2-*TASI* was immunoprecipitated with anti-FLAG tag antibody (Cell Signaling Technology, 14793S) and protein A/G magnetic beads (MedChemExpress, HY-K0202). After three washes with low-salt wash buffer, the proteins were eluted with SDS loading buffer and detected by WB analysis.

### **MTS assay, BrdU cell proliferation assay**

ESCC cells were seeded in 96-well culture plates at 800 cells per well. Cell viability was assessed daily for 5 consecutive days using MTS (Qiagen, Hilden, Germany) following the manufacturer's guidelines. The absorbance was measured at a wavelength of 490 nm on a Synergy Multi-Mode

Microplate Reader (Biotek, Vermont, USA). A BrdU cell proliferation assay was performed using a BrdU Cell Proliferation ELISA Kit (Abcam, ab126556) according to the instructions.

#### **Transwell migration assay and Matrigel invasion assay**

Migration and invasion assays were performed using 24-well plates and 8- $\mu$ m pore size Transwell filter inserts (Corning, NY, USA) with or without precoating with Matrigel (Corning, NY, USA). ESCC cells ( $2 \times 10^5$ ) in FBS-free medium were added to the upper chamber, while the bottom chamber contained medium supplemented with 20% FBS. After incubation at 37 °C for 24 h (migration) or 48 h (invasion), the membrane was washed, fixed and stained with crystal violet (Sangon Biotech, China). Then, invading or migrating cells on the underside of the membrane were counted in five random fields under a microscope.

#### **Western blotting (WB) analysis**

WB analysis was performed according to the instructions. Cells were lysed in RIPA lysis buffer. The protein concentrations were calculated using a BCA assay kit (Thermo Fisher Scientific, US). Anti-Vinculin (1:1000, Cell Signaling Technology, 13901), anti-TMPO (1:1000, Affinity Biosciences, DF13264), anti-FUS (1:1000, Abcam, ab70381), anti-p300 (Cell Signaling Technology, 70088S), anti-CyclinD1 (1:1000, Abcam, ab134175), and anti-MTA1 (1:1000, Abcam, ab71153) were used in this study.

#### **Immunohistochemistry (IHC) assays**

For the IHC assays, staining and analysis were performed according to the manufacturer's instructions<sup>53</sup>. Anti-Ki67 (1:250, Abcam, ab15580), anti-LAP2 (1:400, Affinity Biosciences, DF13264), anti-CyclinD1(1:100, Abcam, ab134175), anti-MTA1(1:500, Abcam, ab71153) were used. For quantification analysis, we evaluated the staining area and intensity of all markers.

### **Cell line-derived xenograft (CDX) and patient-derived xenograft (PDX) models**

For CDX models,  $1 \times 10^6$  ESCC cells expressing the control shRNA (shCtrl) or TAS1-targeting sh#1 or sh#2 were injected subcutaneously into the dorsal flanks of 4-week-old female BALB/c nu/nu mice (five mice per group). Tumor growth was monitored every 3 days after transplantation using calipers. Mice bearing xenografts were euthanized at the endpoint, and tumor weights were measured. PDX models were constructed as described previously, and fresh ESCC samples obtained from patients were immediately subcutaneously inoculated into both flanks of nude mice. When the first generation of established PDXs (P1) reached  $\sim 500$  mm<sup>3</sup>, the tumors were cut into pieces of  $\sim 10$  mm<sup>3</sup> and transplanted into other mice (P2). Ultimately, mice bearing P3 grafts were used to assess the therapeutic effects of TAS1 in vivo using antisense oligonucleotides (ASOs). When the P3 grafts reached  $\sim 500$  mm<sup>3</sup> at approximately twenty-one days after transplantation, we began to inject 5 nmol of scrambled or in vivo-optimized TAS1 ASOs (RiboBio) per intratumoral injection every 3 days for 4 continuous doses. The target sequence is provided in Supplementary Table 1. Tumor sizes were measured every 3 days just before the next injection. The mice were euthanized at the endpoint, the tumors were dissected, and tumor weights were measured. All CDX and PDX tissues underwent subsequent pathological analyses.

### **In vivo metastasis models**

For the lung metastasis model,  $1 \times 10^6$  ESCC cells expressing luciferase and transfected with shCtrl or TAS1-targeting sh#1 or sh#2 were intravenously injected into 4-week-old female BALB/c nu/nu mice (six mice per group) through the tail vein. In vivo bioluminescence imaging was performed every four weeks after inoculation. The mice were euthanized 8

weeks after the injection. The lungs were dissected and fixed with 4% paraformaldehyde. Subsequently, consecutive tissue sections were obtained and stained with hematoxylin-eosin (H&E) to observe the metastatic nodules in the lungs under a microscope. The number of lung nodules was measured.

For the inguinal sentinel lymph node metastasis model,  $1 \times 10^6$  ESCC cells transfected with shCtrl or TAS1-targeting sh#1 or sh#2 were injected into the left footpads of 4-week-old female BALB/c nu/nu mice (six mice per group). Eight weeks after the injection, the mice were euthanized, the corresponding inguinal areas were dissected, and the lymph nodes were collected and fixed with 4% paraformaldehyde. Consecutive slices were made and stained with H&E to observe metastatic micro nodules under a microscope. The metastatic positive lymph node was determined when at least one spot of metastatic micro nodules was observed. The number of metastasis-positive lymph nodes was measured.

#### **Nuclear run-on (NRO) assay**

The NRO assay was performed as described. Nuclei from  $4 \times 10^6$  ESCC cells were freshly isolated with NP-40 lysis buffer and incubated ice before use. Nuclear pellets were resuspended in 40  $\mu$ l of nuclei storage buffer and used for the transcription assay. Then, the suspended nuclei were incubated with 60  $\mu$ l of transcription reaction buffer cocktail and 0.1  $\mu$ mol of BrUTP (Absin, abs42010946) at 30 °C for 30 min. Then, RNAs were isolated with TRIzol Reagent (Invitrogen, USA). The nascent bromouridylated RNA transcripts were immunoprecipitated with 2  $\mu$ g of an anti-BrdU antibody (Abcam, ab6326) and Protein A/G magnetic beads (MedChemExpress, Shanghai, China) and subjected to quantitative real-time PCR (qPCR) analysis to detect nascent TMPO mRNA expression.

## Supplementary Tables

Supplementary Table 1. Sequences of TMPO-AS1 in vivo optimized ASO

| ASO name             | Target sequence     |
|----------------------|---------------------|
| TMPO-AS1(2OMe+5Chol) | GCAATGGTATTAAGCTCAA |

Supplementary Table 2. Primer list

| Gene name | Forward                  | Reverse                  |
|-----------|--------------------------|--------------------------|
| TMPO-AS1  | CCAGACCCGGACACAAAAGA     | CTGCGTTTCTACCTCCTCTCG    |
| ACTB      | CTACCTCATGAAGATCCTCACCGA | TTCTCCTTAATGTCACGCACGATT |
| U6        | GCTTCGGCAGCACATATACTAA   | TTGCGTGTTCATCCTTGCG      |
| 18SrRNA   | CAGCCACCCGAGATTGAGCA     | TAGTAGCGACGGGCGGTGTG     |
| TMPO      | CCCCTCGGTCCTGACAAAAG     | CGCTCTTCGTCACTGGAGAA     |
| TMPO      | ACATTTGCCTATGTGTCCAG     | GAATCTGAGCTCCAAACTATGTT  |
| Promoter1 |                          |                          |
| TMPO      | AAAGCCAGAGACGGTTTCAA     | GGAAGCCAGA CCTCTACAAT    |
| Promoter2 |                          |                          |
| TMPO      | GCGCACAAAAGCAGTACGA      | CTGAGCGAGA GGAGGTAGA     |
| Promoter3 |                          |                          |
| TMPO      | TTCGCAGATCCCCGAGATG      | TGCAGGTAGAGCTGGACGTACA   |
| Promoter4 |                          |                          |
| METAP2    | AAAGGACAAGAATGCGAATACCC  | CAGGCTTGATCCAGCTCATTAC   |
| RPL13A    | GCCATCGTGGCTAAACAGGTA    | GTTGGTGTTTCATCCGCTTGC    |
| RB1       | CTCTCGTCAGGCTTGAGTTTG    | GACATCTCATCTAGGTCAACTGC  |
| PTEN      | TGGATTCGACTTAGACTTGACCT  | GGTGGGTTATGGTCTTCAAAGG   |
| RPSA      | GTGGCACCAATCTTGACTTCC    | GCAGGGTTTTCAATGGCAACAA   |
| DENR      | ACAGTGCCAAGTTAGATGCCG    | TCCTTGACCCTCACTAATTCCA   |
| CD44      | CTGCCGCTTTGCAGGTGTA      | CATTGTGGGCAAGGTGCTATT    |

|         |                           |                          |
|---------|---------------------------|--------------------------|
| TNFSF10 | TGCGTGCTGATCGTGATCTTC     | GCTCGTTGGTAAAGTACACGTA   |
| GNRH1   | CAAAAACCTCCTAGCTGGCCTT    | CAGTTGACCAACCTCTTTGACT   |
| HTATIP2 | CGGAGGGATTTGTTTCGTGTTG    | AGCTCCTTTAGAGGATAGCAAGT  |
| HPRT1   | CCTGGCGTCGTGATTAGTGAT     | AGACGTTTCAGTCCTGTCCATAA  |
| IL18    | TCTTCATTGACCAAGGAAATCGG   | TCCGGGGTGCATTATCTCTAC    |
| SMAD4   | ACGAACGAGTTGTATCACCTGG    | TGCACGATTACTTGGTGGATG    |
| NME1    | AAGGAGATCGGCTTGTGGTTT     | CTGAGCACAGCTCGTGTAATC    |
| MDM2    | GAATCATCGGACTCAGGTACATC   | TCTGTCTCACTAATTGCTCTCCT  |
| NME2    | CCACCTCTTATTCATAGACCCA    | AGATTCAAAGCCAGGCACCAT    |
| SET     | AGCAAGAAGCGATTGAACACA     | TGGTTGGCGGAGTTTGTATATT   |
| KRAS    | ACAGAGAGTGGAGGATGCTTT     | TTTCACACAGCCAGGAGTCTT    |
| CCL7    | CAAGACCAAACCTGGACAAGGAGAT | AGAACCACTCTGAGAAAGGACAGG |
| SMAD2   | CGTCCATCTTGCCATTCACG      | CTCAAGCTCATCTAATCGTCCTG  |
| IL1B    | ATGATGGCTTATTACAGTGGCAA   | GTCGGAGATTTCGTAGCTGGA    |
| B2M     | GAGGCTATCCAGCGTACTCCA     | CGGCAGGCATACTCATCTTTT    |
| ETV4    | GATGAAAGCCGGATACTTGGAC    | TTCGCGCAAGCTCCCATTT      |
| CXCR4   | ACTACACCGAGGAAATGGGCT     | CCCACAATGCCAGTTAAGAAGA   |
| CTSK    | ACACCCACTGGGAGCTATG       | GACAGGGGTACTTTGAGTCCA    |
| MTSS1   | CAGTCCCAGCTTCGGACAAC      | TGAGAGCAGATCCAATCTCCC    |
| PNN     | GTCGCCGTGAGAACTTTGC       | GGTCCTCCTCCACTATCTGAGA   |
| CTSL1   | CTTTTGCCTGGGAATTGCCTC     | CATCGCCTTCCACTTGGTC      |



|        |                           |                           |
|--------|---------------------------|---------------------------|
| VEGFA  | AGGGCAGAATCATCACGAAGT     | AGGGTCTCGATTGGATGGCA      |
| TIMP4  | CCACTCGGCACTTGTGATTC      | CATCCTTGACTTTTCTCAAACCCT  |
| MET    | AGCAATGGGGAGTGTAAGAGG     | CCCAGTCTTGACTCAGCAAC      |
| MMP7   | GAAAGAAATAGAACTTCAGGCAGA  | GAGTGGAGGAACAGTGCTTATC    |
| TRPM1  | CAGACAGTAAGTTTTCCATCCC    | GAGTACAGTTCAATCACGGACC    |
| MMP10  | CAGTAGACAAAGAAGGTAAGGG    | AGAGGATAGGCAGAGCAGA       |
| MYCL1  | GATGGATGGAGATGTGGAAT      | CGACTCGGAGAATGAAGAAAT     |
| MMP3   | GGAGACTTTTACCCTTTTGATGG   | TGGTCCCTGTTGTATCCTTTGT    |
| CDKN2A | CCCCGATTGAAAGAACCAGAGAG   | TACGGTAGTGGGGGAAGGCATA    |
| RORB   | GCTTGATTTAGTGCTTATTGTGTC  | TGGGTCTTCTCTTTCTACCTTTTCT |
| HPSE   | TCTTCCTTGGTAGCAGTCCGT     | TTTCATCAATGGGTCCGAGTT     |
| CXCR2  | CCCTGCCTGTCTTACTTTTCCGA   | ATCCGCCAGTTTGCTGTATTGTTG  |
| APC    | CTTCCTCTCCTCATCCAGCTTTTAC | ACGCCTGCCTCTCTTGTATC      |
| SSTR2  | GGACCACCACAAAGTCAAACA     | GCTTCCCTTCTACATATTCAACG   |
| HGF    | CTCTGGTTCCCCTTCAATAGCAT   | TTCCCTTGTAGCTGCGTCCT      |
| FXD5   | GTTTCATCAGCAGGCCAGGTT     | ACATTCAGGTCCCGACACGAG     |
| CDH11  | CAGATAAAGCAATCTCATGTCTTCC | GTAGCACCAACACCCTCACCA     |
| KISS1  | CCTGCCGAACTACAACCTGGAAC   | TCCCTTAGCCCTACGTCCC       |
| MYC    | CGTCCTCGGATTCTCTGCTC      | CGATTTCTCCTCATCTTCTTGTTT  |
| MMP13  | ATACTACCATCCTACAAATCTCG   | CATCTAAGGTGTTATCGTCAAGT   |
| MGAT5  | GGGAACCCAAGTCCAACAAAC     | TGAAATCAAAGGCAGAACCAG     |
| SYK    | CTTCACTTCCTTTTCATCCCTC    | CTAGTTACCCAACATTACGCC     |

|        |                           |                           |
|--------|---------------------------|---------------------------|
| KISS1R | CCGAGACCTGCTGGATGTAGT     | ACGTGACCTTCCTCCTGTGCT     |
| CDH1   | CAAATCCAACAAAGACAAAGAAGGC | ACACAGCGTGAGAGAAGAGAGT    |
| IGF1   | TGTCCTCCTCGCATCTCTTCTACC  | CCCCTGTCTCCACACACGAACT    |
| NR4A3  | CAGTGGGACAGTATCTGGAATAA   | GTCTCAGTGTTGGAATGGTAAA    |
| CDH6   | TGGACAACAAATGTACCGACA     | AGCTCAAGCTATAAACAGAAGGAC  |
| CXCL12 | TCACATCTAACCTCATCTTCTTCAC | ACTCTTCACATAGCACATTGTTCTC |
| CST7   | TCAGTGACAACGGAGAACAGG     | GGAGGTGGAAATTGGCAGAAC     |
| TP53   | AGCTTTGAGGTGCGTGTTTGTG    | TCTCCATCCAGTGGTTTCTTCTTTG |
| TIMP2  | GCTTTCATTTCGTCTCCCGTCTTT  | CGGCTCTTCTTAACCTGTTTTGTTT |
| MTA1   | TTGTCTGTGAGTGGGTTGTGC     | TGTTAAAAGAAGGCGAGGAGG     |
| ITGB3  | TTACCTCCTAATTCCACACCCTCAC | CTGGCTCTACAATAGCACTCTCTCC |
| ITGA7  | CCTTGAAGTGTGTCGGTCTT      | ACTTGATGCTCCGAGATGCCT     |
| TSHR   | CTGGAATCACACTCCTTCTACA    | TGGAATAAACTTTGGTCAGGTC    |
| FN1    | AAGCCCATAGCTGAGAAGTGTTTTG | GGATGTCCTTGTGTCCTGATCGT   |
| NME4   | TGATGTGGACGCTGAAGTCAC     | AGGTCTGGGAAGGGTACAATG     |
| GAPDH  | GGACCTGACCTGCCGTCTAG      | GTAGCCCAGGATGCCCTTGA      |
| CTNNA1 | CGTCGCCTCTACCAAATACC      | CTTCTGAGATGCCCGTTTA       |
| TIMP3  | CTATCGGTATCACCTGGGTTGTA   | ATGCAGGCGTAGTGTGTTGGA     |
| MMP9   | CCACCCTTGTGCTCTTCCCTG     | TCTGCCACCCGAGTGTAACCA     |
| FGFR4  | ACGAGACTCCAGTGCTGATGG     | TCGAATAGGCACAGTTACCCC     |
| MMP11  | GGTCTTGGTAGGTGCCTGCATC    | CCTCCCCATTTGACTGTGAACTTT  |
| PLAUR  | TGGCCGGGCTGTCACCTATT      | TTGGACGCCCTTCTTCACCTT     |

|        |                           |                           |
|--------|---------------------------|---------------------------|
| FAT1   | TTCTCACCAGTGCCTTTTGT      | TTGAATCCATCCACCCTCCTA     |
| MCAM   | TGAGGACTGGCAGTGGAAGTG     | CGGCAAGTGAACAAGACCAAG     |
| TGFB1  | GAAACCCACAACGAAATCTATGAC  | ACGTGCTGCTCCACTTTTAACT    |
| MMP2   | AACTACAACCTCTTCCCTCGCAA   | CAAAGGCATCATCCACTGTCTCT   |
| FLT4   | GATGGTGGTCACATAGAAGTAGAT  | TGGAGGGAAAGAATAAGACTGT    |
| CD82   | TTCAGTCAGGATGGGCAAGAG     | CCATTCCGAAGACTACAGCAA     |
| EPHB2  | AACGTGTTTGAGTCAAGCCAGAA   | ACGCACCGAAAACCTCATCTCC    |
| TCF20  | CGGGTAATGGTATCGGAAGGA     | GGTTTGTGGCAGGCTCTATGG     |
| COL4A2 | CAACAGAGGACTTGGTTTCTACGGA | TGTA CTGATCTGGGTGGAAGGTGA |
| BRMS1  | GCAGTTTGT CATCCCACCATT    | GGAGCCTCAAGATT CGCATTC    |
| SRC    | ATCACTTCCTTGCCCCATTTC     | CATCCTCAGACCCCTTGTTTCCT   |
| NF2    | TGTATCGGGAACCATGATCTATTTA | CTCCATCTGCTTTCTAGCCTTCT   |
| CHD4   | AAGTCTTCTTGGTAACTGTGGC    | GATCTGACCCCTATTGTGGTAG    |
| HRAS   | GTGGAATCTCGGCAGGCTCA      | CGCACCAACGTGTAGAAGGCAT    |
| EWSR1  | CTGGTAGGAGGGTAGGATGGA     | TGGAAACAAGCCCACTGAGAC     |
| CTBP1  | AAAGCTGAAGGGTTCCGACTC     | CTCAACGAGCACAACCACCAC     |
| ANAPC2 | CCTGCGTGAGTTCCACAAGT      | GCGGTAGAAGAACCTTTGCAC     |
| CCND1  | GCTGCGAAGTGGAACCATC       | CCTCCTTCTGCACACATTTGAA    |
| CCNE1  | GCCAGCCTTGGGACAATAATG     | CTTGACGTTGAGTTTGGGT       |
| CDC34  | CATCGACTACCCATACTCTCCA    | GAGAATGGTCCTGACGTTCTG     |
| CDK4   | ATGGCTACCTCTCGATATGAGC    | CATTGGGGACTCTCACACTCT     |
| CDK6   | CCAGATGGCTCTAACCTCAGT     | AACTTCCACGAAAAAGAGGCTT    |

|        |                        |                         |
|--------|------------------------|-------------------------|
| CDKN1B | AACGTGCGAGTGTCTAACGG   | CCCTCTAGGGGTTTGTGATTCT  |
| CDKN3  | TCCGGGGCAATACAGACCAT   | GCAGCTAATTTGTCCCGAAACTC |
| CUL1   | GATCTGGGACGACCTCAGAG   | CCCCTTTTTCGACTTAGAAGGAG |
| CUL3   | GATGCACTGCCTTGACAAATCA | CCTTGCTCCCTCAAATAGGAACT |
| SKP2   | ATGCCCCAATCTTGTCCATCT  | CACCGACTGAGTGATAGGTGT   |

---

Supplementary Table 3. Sequences of TMPO-AS1 probes for ChIRP

| ChIRP Probe      | Target sequence             |
|------------------|-----------------------------|
| TMPO-AS1 probe#1 | AGTACGACCTGTCCCTTATC-/3bio/ |
| TMPO-AS1 probe#2 | TTAGGATTCTTGCGGGTGGT-/3bio/ |
| TMPO-AS1 probe#3 | CAATAGCCCAACCTCTTAGC-/3bio/ |
| TMPO-AS1 probe#4 | GGCAGGAAGGAGAGTAGAAA-/3bio/ |
| TMPO-AS1 probe#5 | GTGCCCGATTGTAGAGGTCT-/3bio/ |
| TMPO-AS1 probe#6 | CATGGGTCACCTACAAGCAT-/3bio/ |
| TMPO-AS1 probe#7 | CCTACATCCAAGGTCTCCTT-/3bio/ |
| TMPO-AS1 probe#8 | CCAGTGTTGAGTGCTCCTGA-/3bio/ |
| TMPO-AS1 probe#9 | TGGAGCATGGTTTAGTCCAA-/3bio/ |
| Scramble         | GCTCCCGTACCGTATTCTAA-/3bio/ |



Supplementary Table 5. Correlation between TMPO-AS1 expression and clinicopathological features in 108 ESCC patients

| Variable               | low TMPO-AS1<br>n (%) | high TMPO-AS1<br>n (%) | <i>P</i> value |
|------------------------|-----------------------|------------------------|----------------|
| Total                  | 54(50.0)              | 54 (50.0)              |                |
| Age, years             |                       |                        | 0.846          |
| >58                    | 30 (55.6%)            | 31 (57.4%)             |                |
| ≤58                    | 24 (44.4%)            | 23 (42.6%)             |                |
| Gender                 |                       |                        | 0.835          |
| Female                 | 16 (29.6%)            | 17 (31.5%)             |                |
| Male                   | 38 (70.4%)            | 37 (68.5%)             |                |
| Differentiation status |                       |                        | >0.999         |
| Well/Moderate          | 45 (83.3%)            | 45 (83.3%)             |                |
| Poor and others        | 9 (16.7%)             | 9 (16.7%)              |                |
| Tumor depth            |                       |                        | 0.144          |
| m/sm/mp                | 20 (37.0%)            | 13 (24.1%)             |                |
| ss/se/si               | 34 (63.0%)            | 41 (75.9%)             |                |
| Lymph node invasion    |                       |                        | 0.695          |
| Absent                 | 33 (61.1%)            | 31 (57.4%)             |                |
| Present                | 21 (38.9%)            | 23 (42.6%)             |                |
| Vascular invasion      |                       |                        | 0.433          |
| Absent                 | 34 (63.0%)            | 30 (55.6%)             |                |
| Present                | 20 (37.0%)            | 24 (44.4%)             |                |
| Distant metastasis     |                       |                        | 0.375          |
| Absent                 | 49 (90.7%)            | 46 (85.2%)             |                |
| Present                | 5 (9.3%)              | 8 (14.8%)              |                |
| Clinical stage         |                       |                        | 0.699          |
| I, II                  | 29 (53.7%)            | 31 (57.4%)             |                |

III, IV

25 (46.3%)

23 (42.6%)

---

The P value was determined by a Chi-square test. All the statistical tests were two-sided.

Abbreviations: m: tumor invasion of mucosa; sm: submucosa; mp: muscularis propria; ss: subserosa; se: serosa penetration; si: invasion to adjacent structures.



Supplementary Table 6: Effect of factors on overall survival in ESCC patients in the univariate and multivariate cox regression model

| Factors             | univariate             |         | multivariate           |         |
|---------------------|------------------------|---------|------------------------|---------|
|                     | HR (95% CI)            | P value | HR (95% CI)            | P value |
| Age                 | 2.004<br>(1.052-3.816) | 0.034   | 1.960<br>(1.023-3.753) | 0.042   |
| Gender              | 1.190<br>(0.856-1.656) | 0.301   | -                      | -       |
| Differentiation     | 1.013<br>(0.744-1.379) | 0.935   | -                      | -       |
| Clinical Stage      | 3.112<br>(1.714-5.652) | <0.001  | 2.792<br>(1.514-5.148) | 0.001   |
| Tumor depth         | 1.752<br>(0.945-3.248) | 0.075   | -                      | -       |
| Lymph node invasion | 2.688<br>(1.946-3.717) | <0.001  | -                      | -       |
| Vascular invasion   | 1.272<br>(0.928-1.742) | 0.135   | -                      | -       |
| Distant metastasis  | 2.006<br>(1.477-2.882) | <0.001  | -                      | -       |
| TMPO-AS1            | 2.701<br>(1.474-4.949) | 0.001   | 2.167<br>(1.163-4.038) | 0.015   |

The P value was determined by the univariate and multivariate cox regression analysis. All the statistical tests were two-sided.

Supplementary Table 7. Target sequences of ASOs and shRNAs used in this study

| <b>siRNA name</b> | <b>Target sequence</b> |
|-------------------|------------------------|
| TMPO-AS1 ASO#1    | ACGCAGTTTAAAAGGCGCTG   |
| TMPO-AS1 ASO#2    | CTTAGACGCCGATAAGGGAC   |
| TMPO-AS1 shRNA#1  | ACGCAGTTTAAAAGGCGCTG   |
| TMPO-AS1 shRNA#2  | CTTAGACGCCGATAAGGGAC   |
| TMPO si#1         | CCAGGAAGCTATATGAGAA    |
| TMPO si#2         | GTGAGTTGGTCGCCAACAA    |
| Negative Control  | UUCUCCGAACGUGUCACGUTT  |



Supplementary Table 9. Correlation between TMPO-AS1/TMPO expression and clinicopathological features in 108 ESCC patients

| Variable               | TMPO-AS1/         |                       | TMPO-AS1/          | <i>P</i> value |
|------------------------|-------------------|-----------------------|--------------------|----------------|
|                        | TMPO low<br>n (%) | Intermediate<br>n (%) | TMPO high<br>n (%) |                |
| Total                  | 43(39.8%)         | 22(20.4%)             | 43(39.8%)          |                |
| Age, years             |                   |                       |                    | 0.222          |
| >58                    | 23(53.5%)         | 16(72.7%)             | 22(51.2)           |                |
| ≤58                    | 20(46.5%)         | 6(27.3%)              | 21(48.8%)          |                |
| Gender                 |                   |                       |                    | 0.781          |
| Female                 | 12(27.9%)         | 8(26.4%)              | 13(30.2%)          |                |
| Male                   | 31(72.1%)         | 14(63.6%)             | 30(69.8%)          |                |
| Differentiation status |                   |                       |                    | 0.170          |
| Well/Moderate          | 39 (90.7%)        | 16(72.7%)             | 35(81.4%)          |                |
| Poor and others        | 4(9.3%)           | 6(27.3%)              | 7(16.3%)           |                |
| Tumor depth            |                   |                       |                    | 0.781          |
| m/sm/mp                | 13(30.2%)         | 8(26.4%)              | 12(27.9%)          |                |
| ss/se/si               | 30(69.8%)         | 14(63.6%)             | 31(72.1%)          |                |
| Lymph node invasion    |                   |                       |                    | 0.511          |
| Absent                 | 23(53.5%)         | 15(68.2%)             | 26(60.5%)          |                |
| Present                | 20(46.5%)         | 7(31.8%)              | 17(39.5%)          |                |
| Vascular invasion      |                   |                       |                    | 0.599          |
| Absent                 | 28(65.1%)         | 12(54.5%)             | 24(55.8%)          |                |
| Present                | 15(34.9%)         | 10(45.5%)             | 19(44.2%)          |                |
| Distant metastasis     |                   |                       |                    | 0.967          |
| Absent                 | 38(88.4%)         | 19(86.4%)             | 38(88.4%)          |                |
| Present                | 5(11.6%)          | 3(13.6%)              | 5(11.6%)           |                |

|                |           |           |           |       |
|----------------|-----------|-----------|-----------|-------|
| Clinical stage |           |           |           | 0.132 |
| I, II          | 20(46.5%) | 16(72.7%) | 24(55.8%) |       |
| III, IV        | 23(53.5%) | 6(27.3%)  | 19(44.2%) |       |

---

The P value was determined by a Chi-square test. All the statistical tests were two-sided.

Abbreviations: m: tumor invasion of mucosa; sm: submucosa; mp: muscularis propria; ss: subserosa; se: serosa penetration; si: invasion to adjacent structures.

Supplementary Table 10. Correlation between TMPO expression and clinicopathological features in 108 ESCC patients

| Variable               | low TMPO<br>n (%) | high TMPO<br>n (%) | <i>P</i> value |
|------------------------|-------------------|--------------------|----------------|
| Total                  | 54(50.0%)         | 54 (50.0%)         |                |
| Age, years             |                   |                    | 0.332          |
| >58                    | 33 (61.1%)        | 28 (51.9%)         |                |
| ≤58                    | 21 (38.9%)        | 26 (48.2%)         |                |
| Gender                 |                   |                    | 0.531          |
| Female                 | 15 (27.8%)        | 18 (33.3%)         |                |
| Male                   | 39 (72.2%)        | 36 (66.7%)         |                |
| Differentiation status |                   |                    | 0.302          |
| Well/Moderate          | 43 (79.6%)        | 47 (87.0%)         |                |
| Poor and others        | 11 (20.4%)        | 7 (13.0%)          |                |
| Tumor depth            |                   |                    | 0.296          |
| m/sm/mp                | 19 (35.2%)        | 14(25.9%)          |                |
| ss/se/si               | 35 (64.8%)        | 40 (74.1%)         |                |
| Lymph node invasion    |                   |                    | 0.117          |
| Absent                 | 28 (51.9%)        | 36 (66.7%)         |                |
| Present                | 26 (48.2%)        | 18 (33.3%)         |                |
| Vascular invasion      |                   |                    | 0.240          |
| Absent                 | 35 (64.8%)        | 29 (53.7%)         |                |
| Present                | 19 (35.2%)        | 25 (46.3%)         |                |
| Distant metastasis     |                   |                    | 0.139          |
| Absent                 | 50(92.6%)         | 45 (83.3%)         |                |
| Present                | 4 (7.4%)          | 9 (16.7%)          |                |
| Clinical stage         |                   |                    | 0.121          |

|         |            |            |
|---------|------------|------------|
| I, II   | 26 (48.2%) | 34 (63.0%) |
| III, IV | 28 (51.9%) | 20 (37.0%) |

---

The P value was determined by a Chi-square test. All the statistical tests were two-sided.

Abbreviations: m: tumor invasion of mucosa; sm: submucosa; mp: muscularis propria; ss: subserosa; se: serosa penetration; si: invasion to adjacent structures.
